# Supplementary material for: Preparation and Performance of AgNWs/PDMS Film-Based Flexible Strain Sensor
Source: MDPI journal article supplement (doi:10.3390/ma16020641), 2023-01-09
Supplement: s1 [file s1]

Supplementary Materials

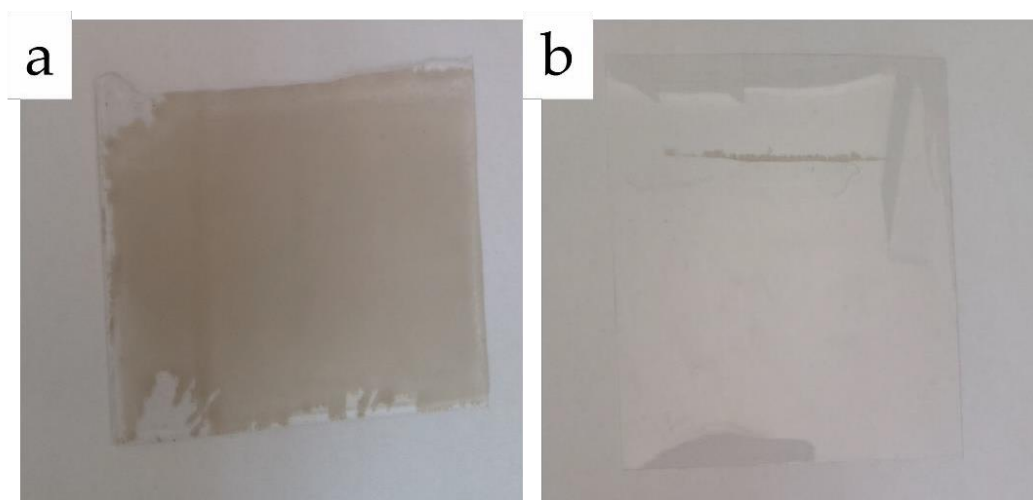

**Figure S1.** (a) AgNWs/PDMS film; (b) PET after strippingReferences.

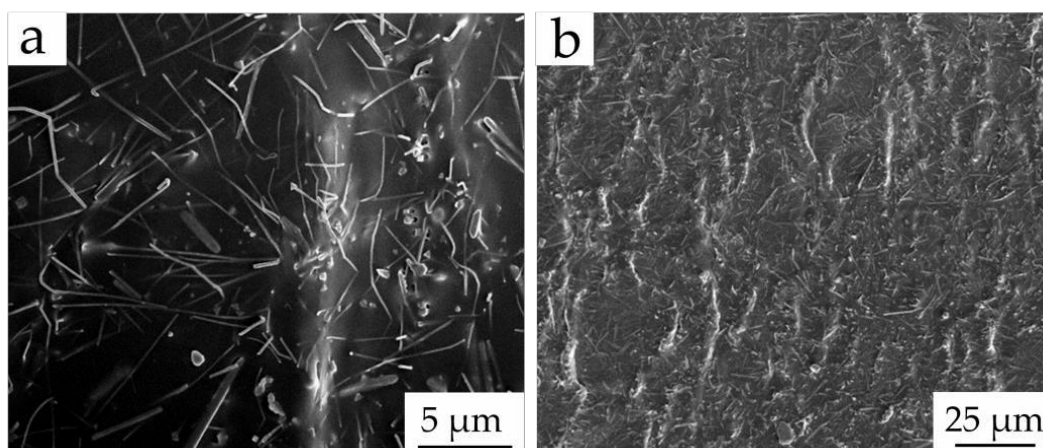

**Figure S2.** SEM images of AgNWs/PDMS film stretched at the magnification of 6000× (a) and 1000× (b).

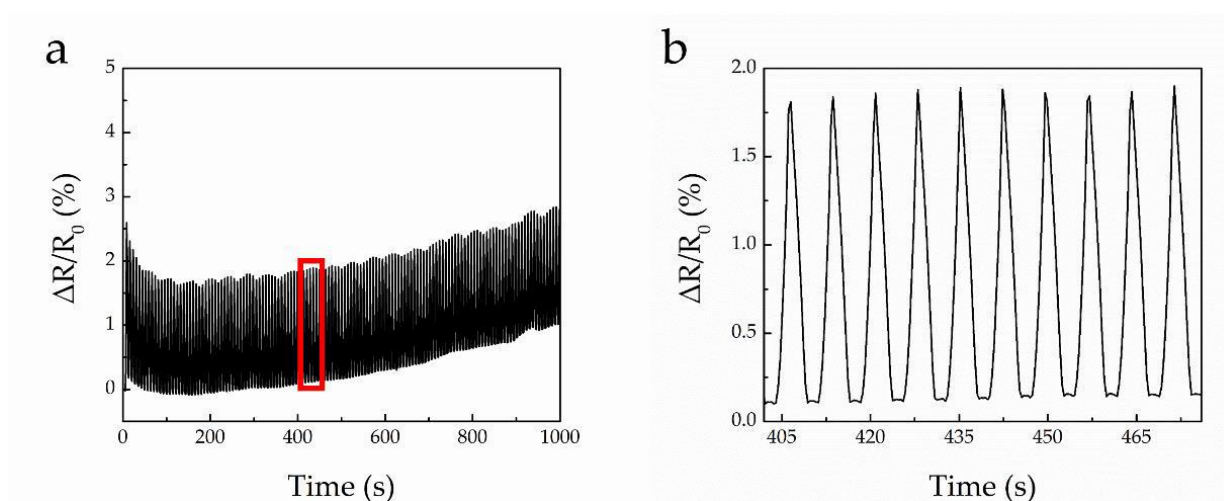

**Figure S3.** (a) The stretching-releasing tests of the strain sensor; (b) The stretching-releasing tests of 10 cycles.

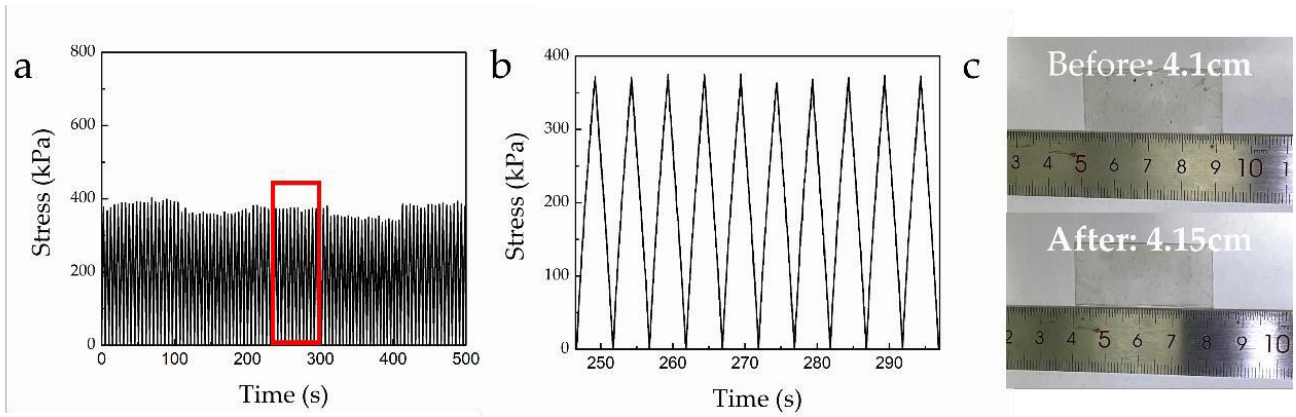

**Figure S4.** (a) The stress variation of the AgNWs/PDMS film in a typical bending cycle of 0-30% strain; (b) The stress variation for 10 cycles; (c) Photographs of the stretching process.

**Table S1.** Recovery rate of recently reported PDMS strain sensors.

| Sample     | Recovery (%) | Strain (%) | Ref       |
|------------|--------------|------------|-----------|
| PDMS/VACNT | 1.75         | 30         | 1         |
| PDMS/CNF   | 2.54         | 50         | 2         |
| Au/Ti/PDMS | 3.7          | 35         | 3         |
| AgNWs/PDMS | 1.22         | 30         | This work |

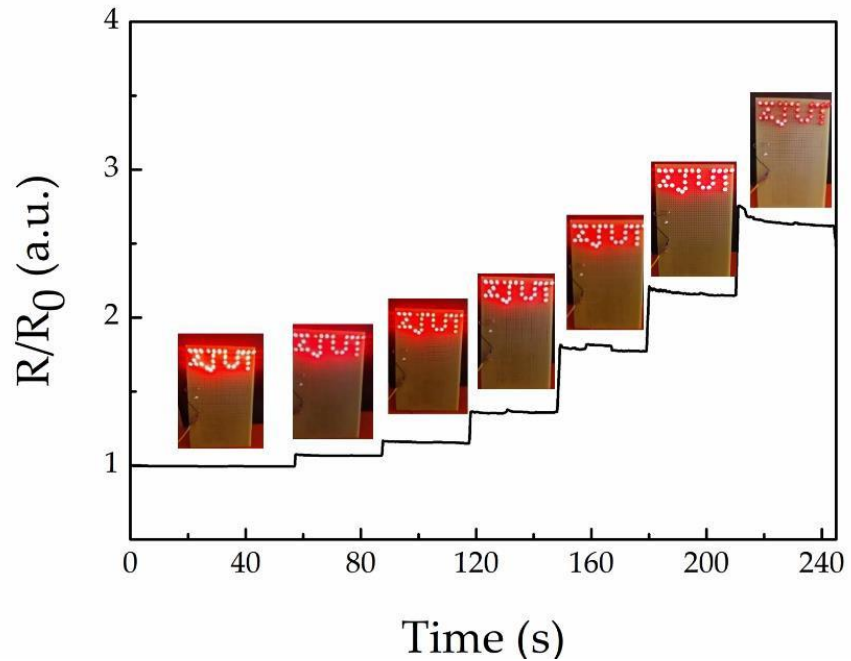

**Figure S5.** Brightness change of LED lamp during strain sensor stretching at 0%, 2%, 4%, 6%, 8%, 10%, 15% strain.

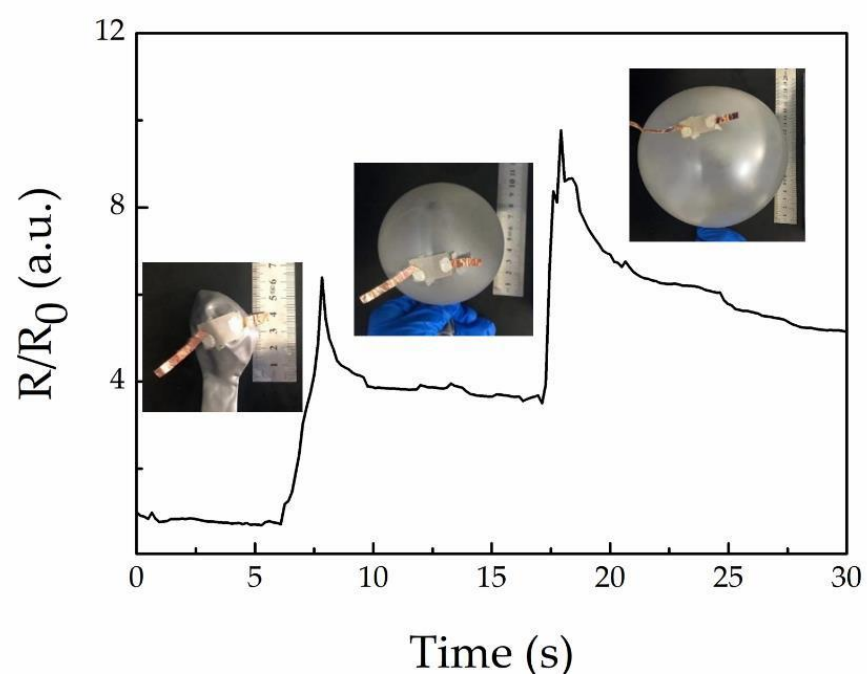

**Figure S6.** Resistance changes of strain sensor during balloon inflation.
